## STUDIES

# Functional composition and diversity of leaf traits in subalpine versus alpine vegetation in the Apennines

Angela Stanisci<sup>1</sup>, Alessandro Bricca<sup>2</sup>, Valentina Calabrese<sup>1</sup>, Maurizio Cutini<sup>2</sup>, Harald Pauli<sup>3</sup>, Klaus Steinbauer<sup>3</sup> and Maria Laura Carranza<sup>1,\*</sup>

<sup>1</sup>EnvixLab, Department of Bioscience and Territory, University of Molise, I-86039 Termoli, Italy, <sup>2</sup>Department of Science, University of RomaTre, I-00146 Roma, Italy, <sup>3</sup>Austrian Academy of Sciences, Institute for Interdisciplinary Mountain Research & University of Natural Resources and Life Sciences Vienna, Department of Integrative Biology and Biodiversity Research, Silbergasse 30/3, A-1190 Vienna, Austria

\*Corresponding author's e-mail address: [carranza@unmol.it](mailto:carranza@unmol.it)

Associate Editor: Gerardo Arceo-Gómez

Citation: Stanisci A, Bricca A, Calabrese V, Cutini M, Pauli H, Steinbauer K, Carranza ML. 2020. Functional composition and diversity of leaf traits in subalpine versus alpine vegetation in the Apennines. *AoB PLANTS* 12: plaa004; doi: 10.1093/aobpla/plaa004

## Abstract

Mediterranean high mountain grasslands are shaped by climatic stress and understanding their functional adaptations can contribute to better understanding ecosystems' response to global change. The present work analyses the plant functional traits of high-elevation grasslands growing in Mediterranean limestone mountains to explore, at the community level, the presence of different plant strategies for resource use (conservative vs. acquisitive) and functional diversity syndromes (convergent or divergent). Thus, we compared the functional composition and diversity of the above-ground traits related to resource acquisition strategies of subalpine and alpine calcareous grasslands in the central Apennines, a mountain region characterized by a dry-summer Mediterranean climate. We used georeferenced vegetation plots and field-measured plant functional traits (plant maximum height, specific leaf area and leaf dry matter content) for the dominant species of two characteristic vegetation types: the subalpine *Sesleria juncifolia* community and the alpine *Silene acaulis* community. Both communities are of particular conservation concern and are rich in endemic species for which plant functional traits are measured here for the first time. We analysed the functional composition and diversity using the community-weighted mean trait index and the functional diversity using Rao's function, and we assessed how much the observed pattern deviated from a random distribution by calculating the respective standardized effect sizes. The results highlighted that an acquisitive resource use strategy and relatively higher functional diversity of leaf traits prevail in the alpine *S. acaulis* community, optimizing a rapid carbon gain, which would help overcome the constraints exerted by the short growing season. The divergent functional strategy underlines the co-occurrence of different leaf traits in the alpine grasslands, which shows good adaptation to a microhabitat-rich environment. Conversely, in the subalpine *S. juncifolia* grassland, a conservative resource use strategy and relatively lower functional diversity of the leaf traits are likely related to a high level resistance to aridity over a longer growing season. Our outcomes indicate the preadaptation strategy of the subalpine *S. juncifolia* grassland to shift upwards to the alpine zone that will become warmer and drier as a result of anthropogenic climate change.

**Keywords:** Calcareous grassland; community-weighted mean traits (CWM<sub>j</sub>); leaf dry matter content (LDMC); Mediterranean mountains; plant maximum height (PMH); Rao's functional diversity (FD<sub>j</sub>); specific leaf area (SLA).

Received: 1 August 2019; Editorial decision: 22 January 2020; Accepted: 3 March 2020

© The Author(s) 2020. Published by Oxford University Press on behalf of the Annals of Botany Company.

This is an Open Access article distributed under the terms of the Creative Commons Attribution License (<http://creativecommons.org/licenses/by/4.0/>), which permits unrestricted reuse, distribution, and reproduction in any medium, provided the original work is properly cited.

## Introduction

Understanding functional trait composition and diversity at the community level is one of the central challenges of modern ecology (Grime 2006; Cornwell and Ackerly 2009; Myers-Smith et al. 2019). Species traits inform the response of plants to the environment (Lavorel and Garnier 2002), and ecological research addressing functional traits can provide a better understanding of the response of natural ecosystems to ongoing anthropogenic global change (Laliberté and Legendre 2010).

Plant functional traits are measurable features affecting the performance of species in a given environment and are of fundamental relevance to community assembly and dynamics, providing insights into how environmental factors shape biodiversity patterns at continental, regional and local scales (Garnier et al. 2004; McGill et al. 2006; Violle et al. 2007; Chelli et al. 2019). Their measurement provides a powerful approach to assess ecosystem transformations in response to changing habitat conditions (Wright et al. 2004; Ackerly and Cornwell 2007; Kleyer et al. 2008; Suding et al. 2008).

Recent ecological research on arctic and alpine tundra has shown that habitat conditions are swiftly dynamic under climate change (Pauli et al. 2012; Winkler et al. 2016; Bjorkmann et al. 2018) and that high mountain vegetation tends to respond with consistent variations in plant species composition and turnover (Myers-Smith et al. 2011; Epstein et al. 2013; Matteodo et al. 2013; Jiménez-Alfaro et al. 2014; Venn et al. 2014; Rogora et al. 2018; Petriccione and Bricca 2019). Even if species identity provides important information related to ecological and evolutionary aspects, further research is needed to better understand how such floristic changes are related to variations in functional trait composition and diversity. Large-scale studies on the plant functional traits of cold-adapted species and communities have been performed in Arctic ecosystems and in the Alps (Bjorkman et al. 2018; Myers-Smith et al. 2019), and shifts in plant functional traits have been investigated along elevational or latitudinal gradients (review in Körner 2012). In contrast, Mediterranean high mountains remain relatively understudied mainly because of the large gap in knowledge concerning field-measured trait data and the high proportion of endemics for which dedicated field surveys are needed (Chelli et al. 2019).

At the community level, plant height and leaf traits are recognized indicators of ecosystem functioning (Diaz et al. 2004; de Bello et al. 2010). The spatial pattern of these commonly measured plant traits (e.g. plant maximum height (PMH), specific leaf area (SLA) and leaf dry matter content (LDMC)) often responds to the underlying heterogeneity in environmental conditions (Hodgson et al. 2011; Bjorkman et al. 2018).

One example of such 'trait-environment' relationships can be observed in mountain areas in which slopes at lower elevation and summit vegetation tend to adopt different ecological strategies (Read et al. 2014). The former is characterized by mild temperatures and fertile soils and preferentially have acquisitive-trait species (tall-broadleaf herbaceous plants) with relatively higher competitive ability and faster resource acquisition capacity (Raich and Schlesinger 1992). Summit vegetation is characterized by low temperatures, a short growing season and low resource availability that promote the occurrence of stress-tolerant species that invest more carbon on a per-leaf basis and develop a resource-conservative trait syndrome (Körner et al. 1989; Körner 2012).

In Mediterranean high mountain vegetation, the functional composition and diversity at the community level have not been investigated to date, and few studies have focused analysing

functional traits along an elevational gradient. Among the existing studies, seminal work showed a positive correlation of leaf size and leaf dry matter content with water availability and soil pH (Gutiérrez-Girón and Gavilán 2013). Recently, Pescador et al. (2015), analysing mountain grasslands in Spain, detected a significant increase in the functional diversity of SLA and LDMC with increasing elevations. In Mediterranean mountains, in addition to the influence of low temperatures, summer drought also plays a key role in shaping biodiversity. The soil water content on summits tends to be higher than that on slopes at lower elevation, which promotes the occurrence of species ensembles that maximize functional diversity (Pescador et al. 2015). On the other hand, a very recent work analysing grasslands along an altitudinal gradient in Italy did not identify any significant trend in functional diversity for leaf traits (Bricca et al. 2019).

In consideration of the above, the present work attempts to describe the functional composition and diversity of above-ground traits at the community level in Mediterranean mountain grasslands, investigating which functional plant resource use strategy (conservative or acquisitive) performs better in two typical and widespread plant communities of the Apennines. We focused on the subalpine *Sesleria juncifolia* community growing on calcareous slopes and the alpine *Silene acaulis* community growing on calcareous ridges, and we compared for the first time their functional strategies at the community level based on field-measured traits. Vegetation data were extracted from the VIOLA (high mountain Vegetation of central Apennines) georeferenced database (Stanisci et al. 2016a), and traits of plant species, including several endemics, were measured in the field for the first time.

Based on plant maximum height, specific leaf area and leaf dry matter content, we analysed the main above-ground resource use strategies of the alpine and subalpine communities by using the community-weighted mean trait index (CWM; Garnier et al. 2004) and functional trait diversity based on Rao's quadratic entropy (FD; Botta-Dukát 2005). In particular, we focused on the following questions: (i) How are the main above-ground plant traits (plant maximum height; specific leaf area; and leaf dry matter content) distributed in the dominant species in high-elevation grasslands growing on calcareous Mediterranean mountains? (ii) Do the leaf traits reveal significant differences in resource use strategies (conservative vs. acquisitive) of alpine and subalpine communities? (iii) Do the species coexisting on alpine and subalpine communities express a convergent or a divergent functional diversity pattern?

As the trait-based approach may help to understand ecosystem functioning and its sensitivity to environmental changes (Matteodo et al. 2013), our outcomes may contribute to understanding which plant functional traits and resource use strategy may be favoured in Mediterranean high-elevation ecosystems in a warmer climate.

## Methods

### Study area and vegetation data

We analysed the subalpine *S. juncifolia* community and the alpine *S. acaulis* community, which are widely distributed above the timberline of the main calcareous mountain ranges of the central Apennines (Biondi et al. 2014; Evangelista et al. 2016; see Supporting Information—Fig. S1). The regional climate at 2200 m in this area is characterized by a summer mean temperature of ~8 °C, precipitation of ~213 mm and a winter mean temperature

of  $\sim 5$  °C below zero (Theurillat et al. 2011; Bricca et al. 2019). Mean annual temperatures in the analysed area have increased during the last 50 years by 1.7 °C (Evangelista et al. 2016; Calabrese et al. 2018).

The selected plant communities host a high number of Apennine endemic species, southern European orophytes and Mediterranean montane taxa (Stanisci et al. 2005, 2011; Peruzzi et al. 2014) and are habitats of European conservation concern (code 6170; European Commission 2013). The *S. juncifolia* community consists of calciphilous stepped and garland grasslands, common in the subalpine zone on rendzina soils, while the *S. acaulis* community consists of patchy grasses growing in wind-scoured fell fields at high elevations on shallow soils rich in debris (Blasi et al. 2003).

We analysed 92 georeferenced vegetation plots extracted from the VIOLA database (high mountain Vegetation of central Apennines; Stanisci et al. 2016a; European Vegetation Archive code EU-IT-019; Chytrý et al. 2016). The average size of the analysed plots was  $\sim 50$  m<sup>2</sup>. Fifty-five of these plots are assigned in VIOLA to the subalpine *S. juncifolia* community, and 37 plots are assigned to the alpine *S. acaulis* community. The chosen plots satisfied the following criteria: (i) the presence of a pool of the representative species for each plant community (Biondi et al. 2014), (ii) a maximized interplot spatial distance (plots distant at least 200 m) and (iii) a comparable vegetation cover. Concerning plot characteristics, the *S. juncifolia* community presents high species richness (mean plot richness = 20.5), while the *S. acaulis* community hosts a low number of species (mean plot richness = 17), many of which are cryophilous and endemic (Stanisci et al. 2011). The elevation of the vegetation plots significantly differed, with the *S. juncifolia* ranging from 1650 to 2510 m a.s.l. and the *S. acaulis* ranging from 2160 to 2910 m a.s.l. [see Supporting Information—Fig. S2].

The nomenclature of taxa follows Pignatti (2019).

### Trait data

We measured the plant traits of the dominant species. Specifically, for each plot, we ordered the species by cover values, and beginning from the species with the highest cover, we summed the cover values of the species to reach at least 70 % of the vegetation cover in the sample [see Supporting Information—Tables S1 and S2]. The percentage of cover of the dominant species per plot varied across the plots, and we assumed a mean value of  $\sim 85$  (*S. acaulis* community = 81.4 and *S. juncifolia* community = 86.7).

The set of measured taxa included 38 species and subspecies for which the following plant functional traits were measured: maximum plant height at maturity (PMH), specific leaf area (SLA) and leaf dry matter content (LDMC) (Table 1; Westoby 1998; Wright et al. 2004). Plant maximum height and leaf trait data were measured in the field with a representative number of replicates conforming to the standardized protocol proposed by Pérez-Harguindeguy et al. (2013). In particular, in the 2016 and 2017 summer seasons, we measured PMH (cm) for at least 10 different individuals of each species and SLA (mm<sup>2</sup> mg<sup>-1</sup>) and LDMC (g mg<sup>-1</sup>) for at least 10 healthy fully expanded leaves of 10 different individuals of each species, for a total of more than 1600 measurements [see Supporting Information—Table S3].

Trait measurements were obtained for the first time for most of the species because they were not available in the existing databases (e.g. TRY; Kattge et al. 2011). In addition, some species, for which trait measurements already existed, were measured again to collect more reliable site-specific measurements and to reduce the effects of intraspecific trait variability (Puglielli et al. 2015; Tardella et al. 2017).

The species mean values of the measured individual traits were analysed.

### Data analysis

We first measured the differences in floristic composition among the two plant communities by a similarity analysis using a one-way analysis of similarities (ANOSIM) test (9999 permutations). Analysis of similarities is a non-parametric statistical test that assesses the differences between two or more groups based on a ranked dissimilarity matrix (Clarke 1993). Then, we explored which species contributed most consistently to the observed differences between vegetation types using a similarity percentage procedure (SIMPER—Clarke 1993—software PAST; Hammer et al. 2008).

We synthesized and compared the functional trait composition and diversity of the subalpine *S. juncifolia* community and the alpine *S. acaulis* community by using two complementary metrics (Ricotta and Moretti 2011): community-weighted mean trait values (CWM; Garnier et al. 2004) and functional trait diversity based on Rao's quadratic entropy (FD; Botta-Dukát 2005). CWM<sub>t</sub> was calculated as follows (Garnier et al. 2004):

$$CWM_t = \sum_{i=1}^n p_i x_i$$

where CWM<sub>t</sub> is the community-weighted mean value of a given functional trait (t),  $p_i$  is the relative abundance of the *i*th species,  $x_i$  is the mean trait value of species *i*, and *n* is the number of species. We calculated CWM<sub>t</sub> separately for each trait (CWM<sub>PMH</sub>, CWM<sub>SLA</sub>, CWM<sub>LDMC</sub>) and for each plant community.

The functional diversity for each functional trait for each plant community was calculated with Rao's quadratic entropy (FD; Botta-Dukát 2005) as follows:

$$FD_t = \sum_{ij} d_{ij} p_i p_j$$

where  $d_{ij}$  is the functional distance between species *i* and *j* measured by the Gower distance (Pavoine et al. 2009) and  $p$  is the relative abundances of the *i*th and *j*th species (Rao 1982). The FD<sub>t</sub> index equals the sum of the dissimilarity in the trait space among all possible pairs of species, weighted by the product of the species' relative abundance. The parameter  $d_{ij}$  varies from 0 (two species have exactly the same trait values) to 1 (two species have completely different trait values).

To quantify how much the observed pattern deviated from a random distribution, we calculated the standardized effect size (SES) for CWM<sub>t</sub> and FD<sub>t</sub> (de Bello 2012; Mason et al. 2013) according to the following formula (Gotelli and McCabe 2002):

$$SES = \frac{I_{obs} - I_{sim}}{\sigma_{sim}}$$

where  $I_{obs}$  is the functional observed value,  $I_{sim}$  is the mean of the functional expected values, and  $\sigma$  is the standard deviation of the functional expected values. Expected values were calculated by shuffling trait values across all species 999 times (Botta-Dukát and Czucz 2016; Vojtkó et al. 2017). This procedure is suitable for detecting both the higher and lower CWM<sub>t</sub> and FD<sub>t</sub> observed values compared to those based on random expectation (Botta-Dukát and Czucz 2016; Zelený 2018) and helps break the link between trait information and species composition. The analysis of CWM<sub>t</sub> SES allowed us to explore the eventual presence of the assembly rule processes (Vojtkó et al. 2017; Bricca et al. 2019); for example, for functional diversity (FD<sub>t</sub>), SES > 0 indicated observed values higher than expected ('functional divergence'),

**Table 1.** List of measured plant traits (and acronym), along with their description, the associated plant function and bibliographic references.

| Trait                          | Description                                                                                                       | Plant function                                                                             | References                                                                     |
|--------------------------------|-------------------------------------------------------------------------------------------------------------------|--------------------------------------------------------------------------------------------|--------------------------------------------------------------------------------|
| Plant maximum height (PMH)     | The distance between the upper boundary of the main photosynthetic tissues on plant and the ground level (in cm). | Competitive ability, dispersal capacity                                                    | Diaz et al. (2016); Pérez-Harguindeguy et al. (2013)                           |
| Specific leaf area (SLA)       | The ratio between leaf area (mm <sup>2</sup> ) and dry weight (mg).                                               | Resource exploitation and conservation; protection against hazard, photosynthetic capacity | Pérez-Harguindeguy et al. (2013); Garnier et al. (2001); Shipley et al. (2005) |
| Leaf dry matter content (LDMC) | The ratio between leaf dry weight (mg) and the respective fresh weight (g).                                       | Resource exploitation and conservation; protection against hazard, leaf lifetime           | Pérez-Harguindeguy et al. (2013); Garnier et al. (2001)                        |

while  $SES < 0$  indicated observed values lower than expected ('functional convergence') (de Bello 2012). Trait values were log-transformed before the calculation (Májeková et al. 2016). Community-weighted means were calculated with the function *functcomp* in the 'FD' R package version 1.0 (Laliberté et al. 2014).  $FD_i$  was calculated with the Rao function proposed by de Bello et al. (2010), which also provided the Jost correction ( $1/1 - FD_i$ ). We assessed the adequateness of the selected percentage cover cut-off for the dominant species by sensitivity analysis as follows: we calculated  $CWM_i$  and  $FD_i$  by gradually reducing the dominant species cover by 5 % starting from the observed cover, and we assessed the correlation of the new index values with original data values (Májeková et al. 2016, function *traitor* in *r*; see Supporting Information—Table S2). We observed a high correlation between indexes calculated with reduced data up to 70 % of the original cover.

Then, we also compared plant communities and tested the presence of significant differences in functional trait composition ( $CWM_i$ ) and diversity ( $FD_i$ ) using the Mann-Whitney U-test (run with the function *wilcox.test* in stats R-package), and we graphically represented the significant results using box plots.

## Results

The floristic comparison between the selected subalpine and alpine communities highlighted significant differences that were mainly caused by variations in species abundance, such as 87 % of the analysed species are present in both plant communities [see Supporting Information—Table S3]. The most frequent species in both plant communities are *Helianthemum oelandicum* subsp. *alpestre*, *Carex kitaibeliana* subsp. *kitaibeliana* and *Anthyllis vulneraria* subsp. *pulchella*. Nevertheless, there is a set of species occurring only in the subalpine grassland: *Brachypodium genuense*, *Cytisus spinescens*, *Carex macrolepis*, *Carex humilis* and *Helianthemum nummularium* subsp. *grandiflorum*. The similarity percentage procedure (SIMPER) analysis showed that the *S. juncifolia* community is characterized by significantly high occurrences of *S. juncifolia* subsp. *juncifolia*, *Globularia meridionalis*, *Anthyllis montana* and *C. humilis*. On the other hand, the *S. acaulis* community is distinguished by significantly high occurrences of *Salix retusa*, *Armeria gracilis* subsp. *majellensis* and *S. acaulis* subsp. *bryoides* (Table 2).

Concerning species trait values [see Supporting Information—Table S3], the graminoids *B. genuense* and *Bromopsis erecta* had the greatest mean plant maximum height values (36.12 and

32.72 cm, respectively), whereas the alpine small cushion plants, *Androsace vitaliana* subsp. *praetutiana* (0.55 cm), *S. acaulis* subsp. *bryoides* (1.25 cm) and *Androsace villosa* subsp. *villosa* (0.18 cm), showed the lowest values. Moreover, the mean SLA values were particularly high for the endemic alpine forbs *Galium magellense* (23.2 mm<sup>2</sup> mg<sup>-1</sup>), *A. gracilis* subsp. *majellensis* (19.46 mm<sup>2</sup> mg<sup>-1</sup>) and *Myosotis graui* (19.24 mm<sup>2</sup> mg<sup>-1</sup>) and very low in the dwarf shrubs *H. oelandicum* subsp. *alpestre* (8.31 mm<sup>2</sup> mg<sup>-1</sup>), *G. meridionalis* (8.38 mm<sup>2</sup> mg<sup>-1</sup>) and *A. montana* (8.94 mm<sup>2</sup> mg<sup>-1</sup>). The highest mean LDMC values were measured in the graminoids *B. genuense* (501.68 mg g<sup>-1</sup>), *B. erecta* (477.28 mg g<sup>-1</sup>) and *Helictochloa praetutiana* (444.70 mg g<sup>-1</sup>), and the lowest values were measured in the alpine forbs *M. graui* (190.29 mg g<sup>-1</sup>) and *Valeriana salianca* (204.14 mg g<sup>-1</sup>).

Notably, most of the species with very light leaves (e.g. *M. graui*, *V. salianca*, *Viola magellensis* and *A. gracilis* subsp. *majellensis*) were endemic alpine forbs.

In general, species with low PMH, high SLA and low LDMC were more frequent in the high-elevation alpine community, whereas in the subalpine grassland, tall herbaceous species with heavier leaves and lower SLA were dominant.

The analysis of functional trait composition ( $CWM_i$ ) and diversity ( $FD_i$ ) revealed significant differences between the two plant communities for all the considered traits: PMH ( $CWM_{PMH}$ ,  $FD_{PMH}$ ), LDMC ( $CWM_{LDMC}$ ) and SLA ( $CWM_{SLA}$ ,  $FD_{SLA}$ ). The alpine *S. acaulis* community was characterized by a lower SES  $CWM_{PMH}$ , a lower SES  $CWM_{LDMC}$  and a higher SES  $CWM_{SLA}$  compared to those of the subalpine *S. juncifolia* community (Fig. 1). Moreover, the analysis of functional diversity ( $FD_i$ ) revealed a higher convergence for PMH (lower SES  $FD_{PMH}$ ) in the alpine *S. acaulis* community than in the *S. juncifolia* community (Fig. 2A). In contrast, in comparison to the *S. acaulis* community, the *S. juncifolia* community was characterized by higher convergence in both leaf traits (lower SES  $FD_{SLA}$  and  $FD_{LDMC}$ ) (Fig. 2B and C).

## Discussion

Our analysis provided new insights into the above-ground resource use strategies of alpine and subalpine species growing in the Mediterranean high mountains and highlighted significant differences in the functional composition and diversity between the subalpine *S. juncifolia* community and the alpine *S. acaulis* community. Such communities are changing under climate change (Evangelista et al. 2016), and according to our results, they adopt a differentiated trait syndrome. The differences in functional strategies of the compared communities are mainly

**Table 2.** Plant species contribution (sp contr. %) to the difference between the subalpine *Sesleria juncifolia* community and the alpine *Silene acaulis* community, assessed by the similarity percentage procedure (SIMPER, Clarke 1993). % plots: percent of the plots in which the species occur. \*Endemic taxon.

| Taxon                                                        | sp contr. (%) | <i>Sesleria juncifolia</i> community (% plots) | <i>Silene acaulis</i> community (% plots) |
|--------------------------------------------------------------|---------------|------------------------------------------------|-------------------------------------------|
| <i>Sesleria juncifolia</i> subsp. <i>juncifolia</i>          | 5.59          | 94.60                                          | 22.20                                     |
| <i>Salix retusa</i>                                          | 4.86          | 7.14                                           | 66.70                                     |
| <i>Globularia meridionalis</i>                               | 4.67          | 60.70                                          | 2.78                                      |
| <i>Anthyllis montana</i>                                     | 4.66          | 62.50                                          | 8.33                                      |
| * <i>Armeria gracilis</i> subsp. <i>majellensis</i>          | 4.58          | 14.30                                          | 69.40                                     |
| <i>Silene acaulis</i> subsp. <i>bryoides</i>                 | 4.14          | 26.80                                          | 69.40                                     |
| <i>Carex humilis</i>                                         | 4.12          | 57.10                                          | 0                                         |
| <i>Edraianthus graminifolius</i> subsp. <i>graminifolius</i> | 3.96          | 76.80                                          | 50.00                                     |
| <i>Helianthemum oelandicum</i> subsp. <i>alpestre</i>        | 3.70          | 89.30                                          | 58.30                                     |
| * <i>Pedicularis elegans</i>                                 | 3.62          | 53.60                                          | 44.40                                     |
| <i>Anthyllis vulneraria</i> subsp. <i>pulchella</i>          | 3.33          | 69.60                                          | 72.20                                     |
| <i>Androsace villosa</i> subsp. <i>villosa</i>               | 3.29          | 39.30                                          | 36.10                                     |
| <i>Trinia dalechampii</i>                                    | 3.23          | 44.60                                          | 19.40                                     |
| <i>Carex kitaibeliana</i> subsp. <i>kitaibeliana</i>         | 3.11          | 73.20                                          | 75.00                                     |
| * <i>Festuca violacea</i> subsp. <i>italica</i>              | 3.03          | 23.20                                          | 41.70                                     |
| * <i>Galium magellense</i>                                   | 2.98          | 3.57                                           | 38.90                                     |
| <i>Thymus praecox</i> subsp. <i>polytrichus</i>              | 2.80          | 33.90                                          | 22.20                                     |
| * <i>Helictochloa praetutiana</i>                            | 2.67          | 30.40                                          | 25.00                                     |
| <i>Arenaria grandiflora</i> subsp. <i>grandiflora</i>        | 2.53          | 8.93                                           | 36.10                                     |
| * <i>Myosotis graui</i>                                      | 2.47          | 10.70                                          | 30.60                                     |
| <i>Iberis saxatilis</i> subsp. <i>saxatilis</i>              | 2.28          | 28.60                                          | 16.70                                     |
| <i>Bromopsis erecta</i>                                      | 2.27          | 28.60                                          | 2.78                                      |
| <i>Kobresia myosuroides</i>                                  | 2.23          | 5.36                                           | 33.30                                     |
| <i>Leontopodium nivale</i>                                   | 2.17          | 26.80                                          | 19.40                                     |
| <i>Potentilla crantzii</i> subsp. <i>crantzii</i>            | 2.06          | 12.50                                          | 27.80                                     |
| <i>Aster alpinus</i> subsp. <i>alpinus</i>                   | 2.01          | 30.40                                          | 5.56                                      |
| * <i>Cerastium thomasii</i>                                  | 1.93          | 1.79                                           | 25.00                                     |
| <i>Oxytropis scampestris</i> subsp. <i>campestris</i>        | 1.73          | 23.20                                          | 11.10                                     |
| <i>Alyssum cuneifolium</i> subsp. <i>cuneifolium</i>         | 1.40          | 1.79                                           | 19.40                                     |
| * <i>Valeriana salianca</i>                                  | 1.29          | 5.36                                           | 19.40                                     |
| * <i>Viola magellensis</i>                                   | 1.25          | 1.79                                           | 19.40                                     |
| * <i>Cerastium tomentosum</i>                                | 1.24          | 14.30                                          | 2.78                                      |
| * <i>Brachypodium genuense</i>                               | 1.22          | 16.10                                          | 0                                         |
| <i>Cytisus spinescens</i>                                    | 0.94          | 10.70                                          | 0                                         |
| <i>Potentilla apennina</i> subsp. <i>apennina</i>            | 0.86          | 10.70                                          | 2.78                                      |
| <i>Carex macrolepis</i>                                      | 0.71          | 8.93                                           | 0                                         |
| * <i>Androsace vitaliana</i> subsp. <i>praetutiana</i>       | 0.57          | 3.57                                           | 5.56                                      |
| <i>Helianthemum nummularium</i> subsp. <i>grandiflorum</i>   | 0.52          | 7.14                                           | 0                                         |

driven by differences in species cover and secondarily by differences in species composition.

### Community-weighted mean traits

The analysis at the community level of the measured plant traits showed differentiated functional syndromes in the compared vegetation types. In comparison to the *S. acaulis* grasslands, the *S. juncifolia* grasslands growing on slopes at lower elevations showed higher mean values of plant maximum height ( $CWM_{PMH}$ ). A comparable trend was recorded in the subalpine grasslands of the Alps (Körner 2003; Pellissier et al. 2010), and it was explained by the longer growing season and the warmer habitat conditions that, at lower elevation in the mountains, favour the occurrence of taller plants (Körner 1989). Furthermore, in such a relatively mild environment, interspecific competition for light becomes a key driver in shaping dense grassland assembly (Venn et al. 2014). The low values of  $CWM_{PMH}$  in the alpine *S. acaulis* grasslands summarize the well-known trend of plant size reduction at the community level due to the temperature decrease at higher altitudes, which is a feature shared by virtually all mountains (e.g. Körner 1989; Pellissier et al. 2010; Dainese et al. 2012; Spasojevic

and Suding 2012; de Bello et al. 2013; Pescador et al. 2015). At higher elevations where the temperature is low and the growing season is short, a low-stature growth form is advantageous over taller forms because daytime temperatures near the ground are far higher than those in the free atmosphere. Plants also benefit from the thermostability of soils, as the compact shape allows heat storage, and a relatively lower size provides protection against wind and allows efficient recycling of nutrients and water storage (Körner 2003).

The community-weighted mean indexes for the leaf traits indicated that the alpine *S. acaulis* grassland was characterized by a higher SLA value ( $CWM_{SLA}$ ) and lower LDMC value ( $CWM_{LDMC}$ ), which seems to be opposite of the common view of altitude adaptation by plants to low-temperature and harsh environmental conditions. Indeed, previous studies have found that plants tend to have relatively smaller leaf area and lower water content at higher altitudes in the Alps and other European summits (Körner 1989, 2003; de Bello et al. 2013; Rosbakh et al. 2015). Harsh environmental conditions and low resource availability on mountain summits have been reported repeatedly in relation to promoting stress-tolerant species that

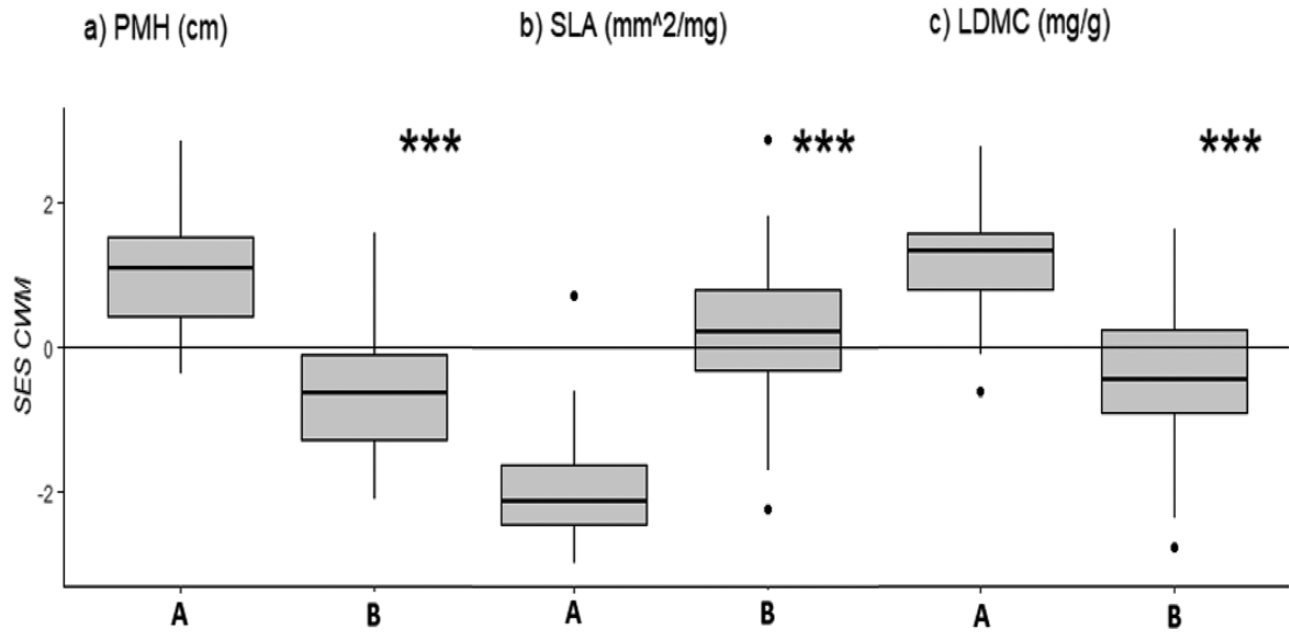

Figure 1. Box plots comparing the standardized effect size (SES)  $CWM_i$  values of subalpine *Sesleria juncifolia* (A on the horizontal axis) and alpine *Silene acaulis* (B on the horizontal axis) communities. The differences in the  $CWM_i$  are significant for (A) plant maximum height (PMH), log cm; (B) specific leaf area (SLA), log  $mm^2 mg^{-1}$ ; and (C) leaf dry matter content (LDMC), log  $mg g^{-1}$ . Statistical significance according to the Mann-Whitney U-test is represented by asterisks (non significant  $P > 0.05$ ; \* $P < 0.05$ ; \*\* $P < 0.01$ ; \*\*\* $P < 0.001$ ).

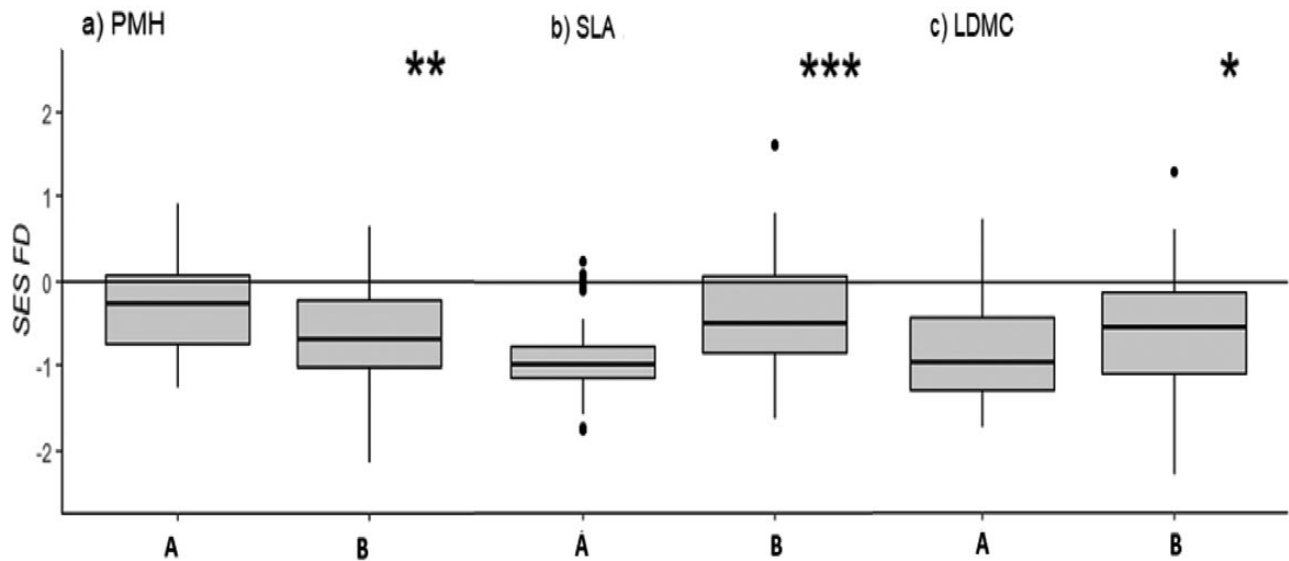

Figure 2. Box plots comparing the standardized effect size (SES)  $FD_i$  values of subalpine *Sesleria juncifolia* (A on the horizontal axis) and alpine *Silene acaulis* (B on the horizontal axis) communities. The differences in the  $FD_i$  are significant for (A) plant maximum height (PMH), log cm; (B) specific leaf area (SLA), log  $mm^2 mg^{-1}$ ; and (C) leaf dry matter content (LDMC), log  $mg g^{-1}$ . Statistical significance according to the Mann-Whitney U-test is represented by asterisks (non significant  $P > 0.05$ ; \* $P < 0.05$ ; \*\* $P < 0.01$ ; \*\*\* $P < 0.001$ ).

invest more carbon on a per-leaf basis (Körner 2012), resulting in lower SLA values (Körner et al. 1989; Pescador et al. 2015). Thus, our conflicting finding is surprising but is likely related to a specific strategy that optimizes rapid carbon gain, which would help overcome the constraints exerted by the short growing season (Gonzalo-Turpin and Hazard 2009) coupled with the summer aridity, which characterizes high elevations in the central Apennines (Olano et al. 2013). To optimize the carbon gain during a short vegetative period, some plants quickly grow during the pre-reproductive phase and shift the acquired resources to

seeds before the end of the growing season (Garnier 1992). In fact, a number of alpine species seem to adopt a ruderal strategy (sensu Grime 1979) early in the growing season, when relatively milder temperatures and good soil nutrient conditions prevail and water is amply available. Then, in midsummer, young leaves may already be desiccated (Körner 2003), and plants shift to a stress-tolerant mode to overcome the drought effects caused by low precipitation, especially in shallow calcareous soils with low water retention capacity. In this context, a study in the Swiss Alps demonstrated that the highest summits are dominated

by stress-tolerant ruderal species (Matteodo et al. 2013), which match a conservative syndrome for some plant traits and an acquisitive syndrome for other traits, at least seasonally.

Interestingly, species with higher SLA and lower LDMC values in the alpine *S. acaulis* community are the endemic species *G. magellense*, *M. graui*, *A. vitaliana* subsp. *praetutiana* and *V. magellensis* that belong to different taxonomic families [see Supporting Information—Table S3]. Such similarities may represent convergent adaptations to the harsh environmental conditions of the summit areas in these Mediterranean calcareous mountains, leading to similar morphological and physiological traits (Ackerly and Reich 1999).

High mean SLA values in the high-elevation plant communities of the Alps were recorded only in snowbed species (Rosbakh et al. 2017). These species exhibit rapid production of horizontal, large, low-cost leaves with a short lifespan and a high SLA in comparison with species growing at early-melting sites (Choler 2005), and this scenario was interpreted as a short phenological phase strategy that assures a relatively higher fitness for the species growing in time-limited habitats.

Regarding the subalpine *S. juncifolia* grassland, the low  $CWM_{SLA}$  and high  $CWM_{LDMC}$  observed are most likely related to an efficient strategy for nutrient conservation (Westoby 1998; Wright et al. 2004). The highest LDMC values were recorded in *Poaceae* and *Cyperaceae* [see Supporting Information—Table S3], which are relatively more abundant in the low-elevation community. Their presence indicates high biomass accumulation, lateral spread and good competitive capacity (Westoby et al. 2002; Cornelissen et al. 2003), which are associated with adequate levels of soil organic matter and nitrogen (Myers-Smith et al. 2011; Vankoughnett and Grogan 2014). Moreover, leaves with high dry matter content may maintain turgor at a relatively lower water potential and enhance drought tolerance and freezing resistance (Pescador et al. 2016). This adaptation to drought and freezing seems to be a general prerequisite of plants in xeric calcareous mountains, such as Mediterranean mountains. The drought effects of the typical dry-summer season in Mediterranean mountains decrease with higher elevations (Giménez-Benavides et al. 2007). The constraint arising from limited water availability is most likely more relevant for plant life in subalpine habitats than those in low-temperature habitats (Cavieres et al. 2006; Schöb et al. 2013). The combined drought and freezing tolerance of grassland species may ensure a type of ‘preadaptation’ to the effects of global warming, as indicated in recent studies concerning species composition and structural changes in central Apennines grasslands over the last four decades (Evangelista et al. 2016; Stanisci et al. 2016b; Frate et al. 2018).

Previous research indicated intraspecific trait variation plays a minor role in high mountain communities’ functional strategies (Pescador et al. 2015; Rosbakh et al. 2015; Henn et al. 2018). Nevertheless, we think that new case studies should also be carried out exploring intraspecific and interspecific variability in a wide variety of taxa and regions to enrich the current ecological knowledge and test whether this general rule is valid in other ecosystems and environmental frames.

### Functional trait diversity

The results of the functional trait diversity analysis showed a convergence of PMH values and a divergence in the SLA and LDMC values in alpine vegetation and an opposite trend for the subalpine grassland. The lower values for  $FD_{PMH}$  in the alpine *S. acaulis* community than in the *S. juncifolia* community had a narrow variation range for plant height,

which should be related to the constraints exerted by the harsh environmental conditions that characterize the high mountain summits (i.e. abiotic filtering through low-temperature conditions and high wind speed; de Bello et al. 2013). In contrast, the higher biotic competition in the dense subalpine grassland probably explains the observed wider variation range for PMH in the subalpine *S. juncifolia* plant communities (Dainese et al. 2015).

The divergent functional strategy of leaf traits ( $SES\ FD_{SLA}$  and  $SES\ FD_{LDMC}$ ) in the alpine *S. acaulis* community indicates the co-occurrence of different leaf traits, allowing improved adaptability in a microhabitat-rich environment (Choler 2005; Stanisci et al. 2011) and underlining high diversity in several ecological processes, such as photosynthesis, growth rates, leaf longevity and litter decomposability. Therefore, a relatively higher divergence of SLA values may have positive effects on ecosystem processes such as productivity and nutrient retention in an environmental context where biotic competition is low (Tilman et al. 1997).

In contrast, the observed low functional diversity of leaf traits ( $FD_{SLA} - FD_{LDMC}$ ) in the subalpine *S. juncifolia* grassland may reflect a strategy for preventing water loss during the growing season. This functional leaf syndrome should ensure good performance for the species growing in similar drought-stricken habitats (Nunes et al. 2017). However, de Bello et al. (2012) observed that in arid environments, plant communities can host two sets of functional strategies: tall species with low SLA or short species with high SLA. Our findings are consistent with those from recent studies on Spain (Pescador et al. 2015) that showed the presence of high functional diversity in terms of SLA at higher elevation. In contrast, a similar study conducted in the Alps detected the opposite pattern for SLA, finding greater diversity in this trait at low altitudes than at high altitudes (de Bello et al. 2013).

The different patterns in leaf functional diversity may be explained by climatic differences between the Alps and Mediterranean high mountains. Indeed, as assessed by Pescador et al. (2015), the latter are characterized by the presence of two opposing gradients (cold temperature vs. summer drought) that may cause more stressful conditions in subalpine grasslands that experience greater water limitations during summer, which would result in leaf trait convergence.

### Conclusion

Our outcomes contribute to improving the current knowledge about the functional syndrome at the community level of alpine and subalpine vegetation in Mediterranean mountains, where cold temperatures and summer droughts greatly affect species assemblages and community functional responses.

Moreover, we contribute to reducing the gap in information describing plant traits of high-elevation Apennine endemic species, for which no functional measured data have been obtained to date.

The leaf traits of the alpine *S. acaulis* community at higher elevations with an acquisitive resource use strategy and a leaf trait divergence may have positive effects on ecosystem resilience to moderate global warming effects.

On the other hand, the leaf traits with conservative resource use strategy and leaf trait convergence of the subalpine *S. juncifolia* grassland may plant communities to be more resistant to aridity. This could make them more able to shift upwards on summit slopes that become warmer and drier as a result of global warming.

It would be valuable to conduct similar studies on plant trait patterns in other Mediterranean alpine grasslands, involving multisite comparisons with larger data sets and considering a larger proportion of species in the target communities. This would enhance our understanding of the functional syndrome of these communities and contribute to reducing the gap in knowledge on the functioning of alpine ecosystems of the spatially restricted and highly fragmented Mediterranean high mountains.

## Supporting Information

The following additional information is available in the online version of this article—

**Figure S1.** Localization of the study area and the mountain massifs of central Apennines (Abruzzi Region) where plant traits were collected.

**Figure S2.** Box plots comparing the elevation range of vegetation plots sampled on *Sesleria juncifolia* and *Silene acaulis* communities.

**Table S1.** List of plots (N), the attribution to the two compared communities, subalpine *Sesleria juncifolia* community and alpine *Silene acaulis* community (Community), the massif in which plots were collected (Locality), the plot's geographic coordinates (Coordinates WGS84), the total cover of species per plot (Total cover), the cover of the dominant species for which traits were measured (Dominant species cover) and the cover of dominant species as a percentage of the total cover of species in the plot (Dominant species cover (%)).

**Table S2.** Sensitivity analysis obtained by calculating the correlation among  $CWM_i$  and  $FD_i$  values, considering the overall cover (cover 100 %) and the values that  $CWM_i$  and  $FD_i$  assumed using gradually reduced species cover (step of 5 %).

**Table S3.** List of the dominant species (species, asterisks indicate the Apennine endemic taxa), along with their taxonomic family (Family), Growth form (GF—Raunkiaer 1934; Pignatti 2019; CH FRUT: fruticose chamaephyte, CH PULV: pulvinate chamaephyte, CH REPT: reptant chamaephyte, CH SUFFR: suffruticose chamaephyte, H SCAP: scapose hemicryptophyte, H ROS: hemicryptophyte with rosette, H CAESP: caespitose hemicryptophyte), number of plots in which the species occurs (N pl), mean measured traits (SLA: specific leaf area, LDMC: leaf dry matter content, PMH: maximum plant height), percentage of plots in which the species occurs into the alpine *Silene acaulis* community (% pl alpine) and into the subalpine *Sesleria juncifolia* community (% pl subalpine).

## Sources of Funding

This study was partially supported by Ministero dell'Istruzione, dell'Università e della Ricerca, in the context of NEXTDATA project, and by Österreichischen Akademie der Wissenschaften, in the context of the project MEDIALPS.

## Contributions by the Authors

Conceptualization: A.S., A.B., M.L.C. Project direction: A.S., H.P. Methodology: M.L.C., A.B. Data collection and field work: A.B., V.C., K.S., M.C. Formal analysis: A.B., V.C. Writing – original draft: A.S., A.B., M.L.C., H.P. Writing – editing: A.S., A.B., M.L.C. Supervision: A.S., M.L.C. All co-authors contributed to revisions.

## Conflict of Interest

The authors declare no conflict of interest.

## Acknowledgements

We also thank the editor and the anonymous reviewers for their comments that helped us to improve the manuscript.

## Literature Cited

- Ackerly DD, Reich PB. 1999. Convergence and correlations among leaf size and function in seed plants: a comparative test using independent contrasts. *American Journal of Botany* **86**:1272–1281.
- Ackerly DD, Cornwell WK. 2007. A trait-based approach to community assembly: partitioning of species trait values into within- and among-community components. *Ecology Letters* **10**:135–145.
- Biondi E, Blasi C, Allegranza M, Anzellotti I, Azzella M, Carli E, Casavecchia S, Copiz R, Del Vico E, Facioni L, Galdenzi D, Gasparri R, Lasen C, Pesaresi S, Poldini L, Sbrulli G, Taffetani F, Vagge I, Zitti S, Zivkovic L. 2014. Plant communities of Italy: the Vegetation Prodrome. *Plant Biosystems* **148**:728–814.
- Bjorkman AD, Myers-Smith IH, Elmendorf SC, Normand S, Rüger N, Beck PSA, Blach-Overgaard A, Blok D, Cornelissen JHC, Forbes BC, Georges D, Goetz SJ, Guay KC, Henry GHR, HilleRisLambers J, Hollister RD, Karger DN, Kattge J, Manning P, Prévry JS, Rixen C, Schaepman-Strub G, Thomas HJD, Vellend M, Wilmsking M, Wipf S, Carbognani M, Hermanutz L, Lévesque E, Molau U, Petraglia A, Soudzilovskaia NA, Spasojevic MJ, Tomaselli M, Vowles T, Alatalo JM, Alexander HD, Anadon-Rosell A, Angers-Blondin S, Beest MT, Berner L, Björk RG, Buchwal A, Buras A, Christie K, Cooper EJ, Dullinger S, Elberling B, Eskelinen A, Frei ER, Grau O, Grogan P, Hallinger M, Harper KA, Heijmans MMPD, Hudson J, Hülber K, Iturrate-Garcia M, Iversen CM, Jaroszynska F, Johnstone JF, Jørgensen RH, Kaarlejärvi E, Klady R, Kuleza S, Kulonen A, Lamarque LJ, Lantz T, Little CJ, Speed JDM, Michelsen A, Milbau A, Nabe-Nielsen J, Nielsen SS, Ninot JM, Oberbauer SF, Olofsson J, Onipchenko VG, Rumpf SB, Semenchuk P, Shetti R, Collier LS, Street LE, Suding KN, Tape KD, Trant A, Treier UA, Tremblay JP, Tremblay M, Venn S, Weijers S, Zamin T, Boulanger-Lapointe N, Gould WA, Hik DS, Hofgaard A, Jónsdóttir IS, Jørgensen J, Klein J, Magnusson B, Tweedie C, Wookey PA, Bahn M, Blonder B, van Bodegom PM, Bond-Lamberty B, Campetella G, Cerabolini BEL, Chapin FS 3rd, Cornwell WK, Craine J, Dainese M, de Vries FT, Díaz S, Enquist BJ, Green W, Milla R, Niinemets Ü, Onoda Y, Ordoñez JC, Ozinga WA, Penuelas J, Poorter H, Poschlod P, Reich PB, Sandel B, Schamp B, Sheremeteu S, Weiher E. 2018. Plant functional trait change across a warming tundra biome. *Nature* **562**:57–62.
- Blasi C, Di Pietro R, Fortini P, Catonica C. 2003. The main plant community types of the alpine belt of the Apennine chain. *Plant Biosystems* **137**:83–110.
- Botta-Dukát Z. 2005. Rao's quadratic entropy as a measure of functional diversity based on multiple traits. *Journal of Vegetation Science* **16**:533–540.
- Botta-Dukát Z, Czúcz B. 2016. Testing the ability of functional diversity indices to detect trait convergence and divergence using individual-based simulation. *Methods Ecology and Evolution* **7**:114–126.
- Bricca A, Conti L, Tardella MF, Catorci A, Iocchi M, Theurillat JP, Cutini M. 2019. Community assembly processes along a sub-Mediterranean elevation gradient: analyzing the interdependence of trait community weighted mean and functional diversity. *Plant Ecology* **220**:1139–1151.
- Calabrese V, Carranza ML, Evangelista A, Stinca A, Stanisci A. 2018. Long-term changes in the composition, ecology and structure of *Pinus mugo* scrub in the Apennines (Italy). *Diversity* **10**:70–85.
- Cavieres LA, Badano EI, Sierra-Almeida A, Gómez-González S, Molina-Montenegro MA. 2006. Positive interactions between alpine plant species and the nurse cushion plant *Laretia acaulis* do not increase with elevation in the Andes of central Chile. *The New Phytologist* **169**:59–69.
- Chelli S, Marignani M, Barni E, Petraglia A, Puglielli G, Wellstein C, Acosta A, Bolpagni R, Bragazza L, Campetella G, Chiarucci A, Conti L, Nascimbene J, Orsenigo S, Pierce S, Ricotta C, Tardella FM, Abeli T,



- Aronne G, Bacaro G, Bagella S, Benesperi R, Bernareggi G, Bonanomi G, Brusa G, Buffa G, Burrascano S, Caccianiga M, Calabrese V, Canullo R, Carbognani M, Carboni M, Carranza M, Catorci A, Ciccarelli D, Citterio S, Cutini M, Dalle Fratte M, De Micco V, Del Vecchio S, Di Martino L, Di Musciano M, Fantinato E, Filigheddu R, Frattaroli A, Gentili R, Gerdol R, Giarrizzo E, Giordani P, Gratani L, Incerti G, Mazzoleni S, Mondoni A, Montagnani C, Montagnoli AA, Paura B, Petruzzellis F, Pisanu S, Rossi G, Sgarbi E, Siniscalco C, Slaviero A, Stanisci A, Stinca A, Tomaselli M, Cerabolini BEL. 2019. Plant–environment interactions through a functional traits perspective: a review of Italian studies. *Plant Biosystems* 153:853–869.
- Choler P. 2005. Consistent shifts in alpine plant traits along a mesotopographical gradient. *Arctic, Antarctic, and Alpine Research* 37:444–453.
- Chytrý M, Hennekens SM, Jiménez-Alfaro B, Knollová I, Dengler J, Jansen F, Landucci F, Schaminée JH, Acic S, Agrillo E, Ambarli D, Angelini P, Apostolova I, Attorre F, Berg C, Bergmeier E, Biurrun I, Botta-Dukát Z, Brisse H, Campos JA, Carlón L, Carni A, Casella L, Csiky J, Čuřterevska R, Dajc Stevanovic Z, Danihelka J, De Bie E, de Ruffray P, De Sanctis M, Dickoré WB, Dimopoulos P, Dubyna D, Dziuba T, Ejmæs R, Ermakov N, Ewald J, Fanelli G, Fernández-González F, FitzPatrick Ú, Font X, García-Mijangos I, Gavilán RG, Golub V, Guarino R, Haveman R, Indreica A, Isik Gürsoy D, Jandt U, Janssen JA, Jiroušek M, Kacki Z, Kavgašić D, Kleikamp M, Kolomyichuk V, Krstivojević Cuk M, Krztonoś D, Kuzemko A, Lenoir J, Lysenok J, Marceňo C, Martynenko V, Michalčová D, Moeslund JE, Onyshchenko V, Pedashenko H, Pérez-Haase A, Peterka T, Prokhorov V, Rašomavičius V, Rodríguez-Rojo MP, Rodwell JS, Rogova T, Ruprecht E, Rusina S, Seidler G, Šibík J, Šilc U, Škvorc Ž, Sopotlieva D, Stancic Z, Svenning J-C, Swacha G, Tsiripidis I, Turtureanu PD, Ugurlu E, Uogintas D, Valachovic M, Vashenyak Y, Vassilev K, Venanzoni R, Virtanen R, Weekes L, Willner W, Wohlgemuth T, Yamalov S. 2016. European Vegetation Archive (EVA): an integrated database of European vegetation plots. *Applied Vegetation Science* 19:173–180.
- Clarke KR. 1993. Non-parametric multivariate analysis of changes in community structure. *Australian Journal of Ecology* 18:117–143.
- Cornelissen JHC, Lavorel S, Garnier E, Diaz S, Buchmann N, Gurvich DE, Pausas JG. 2003. A handbook of protocols for standardised and easy measurement of plant functional traits worldwide. *Australian Journal of Botany* 51:335–380.
- Cornwell WK, Ackerly DD. 2009. Community assembly and shifts in plant trait distributions across an environmental gradient in coastal California. *Ecological Monographs* 79:109–126.
- Dainese M, Lepš J, de Bello F. 2015. Different effects of elevation, habitat fragmentation and grazing management on the functional, phylogenetic and taxonomic structure of mountain grasslands. *Evolution and Systematics* 17:44–53.
- Dainese M, Scotton M, Clementel F, Pecile A, Lepš J. 2012. Do climate, resource availability, and grazing pressure filter floristic composition and functioning in Alpine pastures? *Community Ecology* 13:45–54.
- de Bello F. 2012. The quest for trait convergence and divergence in community assembly: are null-models the magic wand? *Global Ecology and Biogeography* 21:312–317.
- de Bello F, Lavorel S, Díaz S, Harrington R, Cornelissen JH, Bardgett RD, Da Silva PM. 2010. Towards an assessment of multiple ecosystem processes and services via functional traits. *Biodiversity and Conservation* 19:2873–2893.
- de Bello FD, Lavorel S, Lavergne S, Albert CH, Boulangeat I, Mazel F, Thuiller W. 2013. Hierarchical effects of environmental filters on the functional structure of plant communities: a case study in the French Alps. *Ecography* 36:393–402.
- Diaz S, Hodgson JG, Thompson K, Cabido M, Cornelissen JH, Jalili A, Band SR. 2004. The plant traits that drive ecosystems: evidence from three continents. *Journal of Vegetation Science* 15:295–304.
- Diaz S, Kattge J, Cornelissen JH, Wright IJ, Lavorel S, Dray S, Reu B, Kleyer M, Wirth C, Prentice IC, Garnier E, Bönsch G, Westoby M, Poorter H, Reich PB, Moles AT, Dickie J, Gillison AN, Zanne AE, Chave J, Wright SJ, Sheremet'ev SN, Jactel H, Baraloto C, Cerabolini B, Pierce S, Shipley B, Kirkup D, Casanoves F, Joswig JS, Günther A, Falczuk V, Rüger N, Mahecha MD, Gorné LD. 2016. The global spectrum of plant form and function. *Nature* 529:167–171.
- Epstein HE, Myers-Smith I, Walker DA. 2013. Recent dynamics of arctic and sub-arctic vegetation. *Environmental Research Letters* 8:015040
- European Commission DG Environment. 2013. Interpretation manual of European Union habitats. [Eur 28. Nature ENV B.3]. [http://ec.europa.eu/environment/nature/legislation/habitatsdirective/docs/Int\\_Manual\\_EU28.pdf](http://ec.europa.eu/environment/nature/legislation/habitatsdirective/docs/Int_Manual_EU28.pdf) (26 June 2019).
- Evangelista A, Frate L, Carranza ML, Attorre F, Pelino G, Stanisci A. 2016. Changes in composition, ecology and structure of high-mountain vegetation: a re-visitation study over 42 years. *AoB Plants* 8:plw004; doi:10.1093/aobpla/plw004.
- Frate L, Carranza ML, Evangelista A, Stinca A, Schaminée JHJ, Stanisci A. 2018. Climate and land use change impacts on Mediterranean high-mountain vegetation in the Apennines since the 1950s. *Plant Ecology & Diversity* 11:85–96.
- Garnier E. 1992. Growth analysis of congeneric annual and perennial grass species. *Journal of Ecology* 80:665–675.
- Garnier E, Cortez J, Billès G, Navas ML, Roumet C, Debussche M, Neill C. 2004. Plant functional markers capture ecosystem properties during secondary succession. *Ecology* 85:2630–2637.
- Garnier E, Shipley B, Roumet C, Laurent L. 2001. A standardized protocol for the determination of specific leaf area and leaf dry matter content. *Functional Ecology* 15:688–695.
- Giménez-Benavides L, Escudero A, Iriondo JM. 2007. Local adaptation enhances seedling recruitment along an altitudinal gradient in a high mountain Mediterranean plant. *Annals of Botany* 99:723–734.
- Gonzalo-Turpin H, Hazard L. 2009. Local adaptation occurs along altitudinal gradient despite the existence of gene flow in the alpine plant species *Festuca eskia*. *Journal of Ecology* 97:742–751.
- Gotelli NJ, McCabe DJ. 2002. Species co-occurrence: a meta-analysis of J. M. Diamond's assembly rules model. *Ecology* 83:2091–2096.
- Grime JP. 1979. *Plant strategies and vegetation processes*. Chichester-New York-Brisbane-Toronto: John Wiley & Sons, Ltd.
- Grime JP. 2006. Trait convergence and trait divergence in herbaceous plant communities: mechanisms and consequences. *Journal of Vegetation Science* 17:255–260.
- Gutiérrez-Girón A, Gavilán R. 2013. Plant functional strategies and environmental constraints in Mediterranean high mountain grasslands in central Spain. *Plant Ecology & Diversity* 6:435–446.
- Hammer Ø, Harper DAT, Ryan PD. 2008. *PAST—PAleontological STatistics, ver. 1.81*. Software documentation.
- Henn JJ, Buzzard V, Enquist BJ, Halbritter AH, Klanderud K, Maitner BS, Michaletz ST, Pötsch C, Seltzer L, Telford RJ, Yang Y, Zhang L, Vandvik V. 2018. Intraspecific trait variation and phenotypic plasticity mediate alpine plant species response to climate change. *Frontiers in Plant Science* 9:1548.
- Hodgson JG, Montserrat-Martí G, Charles M, Jones G, Wilson P, Shipley B, Sharafi M, Cerabolini BE, Cornelissen JH, Band SR, Bogard A, Castro-Díez P, Guerrero-Campo J, Palmer C, Pérez-Rontomé MC, Carter G, Hynd A, Romo-Díez A, de Torres Espuny L, Royo Pla F. 2011. Is leaf dry matter content a better predictor of soil fertility than specific leaf area? *Annals of Botany* 108:1337–1345.
- Jiménez-Alfaro B, Gavilán RG, Escudero A, Iriondo JM, Fernández-González F. 2014. Decline of dry grassland specialists in Mediterranean high-mountain communities influenced by recent climate warming. *Journal of Vegetation Science* 25:1394–1404.
- Kattge J, Diaz S, Lavorel S, Prentice IC, Leadley P, Bönsch G, Cornelissen JHC. 2011. TRY—a global database of plant traits. *Global Change Biology* 17:2905–2935.
- Kleyer M, Bekker RM, Knevel IC, Bakker JP, Thompson K, Sonnenschein M, Poschlod P, Van Groenendael JM, Klimeš L, Klimešová J, Klotz S, Rusch SM, Hermy M, Adriaens M, Boedeltje G, Bossuyt B, Dannemann A, Endels P, Götzenberger L, Hodgson JG, Jackel AK, Kühn I, Kunzmann D, Ozinga WA, Römermann C, Stadler M, Schlegelmilch J, Steendam HJ, Tackenberg O, Wilmann B, Cornelissen JHC, Eriksson O, Garnier E, Peco B. 2008. The LEDA Traitbase: a database of life-history traits of Northwest European flora. *Journal of Ecology* 96:1266–1274.
- Körner C. 2003. *Alpine plant life*, 2nd edn. Berlin: Springer.
- Körner C. 2012. *Alpine treelines: functional ecology of the global high elevation tree limits*. Basel: Springer Science & Business Media.
- Körner C, Neumayer M, Menendez-Riedl SP, Smeets-Scheel A. 1989. Functional morphology of mountain plants. *Flora* 182:353–383.

- Laliberté E, Legendre P. 2010. A distance-based framework for measuring functional diversity from multiple traits. *Ecology* **91**:299–305.
- Laliberté E, Legendre P, Shipley B. 2014. *FD: measuring functional diversity from multiple traits, and other tools for functional ecology. R package version 1.0-12*.
- Lavorel S, Garnier E. 2002. Predicting changes in community composition and ecosystem functioning from plant traits: revisiting the Holy Grail. *Functional Ecology* **16**:545–556.
- Májeková M, Paal T, Plowman NS, Bryndová M, Kasari L, Norberg A, Weiss M, Bishop TR, Luke SH, Sam K, Le Bagousse-Pinguet Y, Lepš J, Götzenberger L, de Bello F. 2016. Evaluating functional diversity: missing trait data and the importance of species abundance structure and data transformation. *PLoS One* **11**:e0149270.
- Mason NW, de Bello F, Moullot D, Pavoine S, Dray S. 2013. A guide for using functional diversity indices to reveal changes in assembly processes along ecological gradients. *Journal of Vegetation Science* **24**:794–806.
- Matteodo M, Wipf S, Stöckli V, Rixen C, Vittoz P. 2013. Elevation gradient of successful plant traits for colonizing alpine summits under climate change. *Environmental Research Letters* **8**:024043.
- McGill BJ, Enquist BJ, Weiher E, Westoby M. 2006. Rebuilding community ecology from functional traits. *Trends in Ecology & Evolution* **21**:178–185.
- Myers-Smith IH, Forbes BC, Wilmsking M, Hallinger M, Lantz T, Blok D, Boudreau S. 2011. Shrub expansion in tundra ecosystems: dynamics, impacts and research priorities. *Environmental Research Letters* **6**:045509.
- Myers-Smith IH, Thomas HJD, Bjorkman AD. 2019. Plant traits inform predictions of tundra responses to global change. *The New Phytologist* **221**:1742–1748.
- Nunes A, Köbel M, Pinho P, Matos P, de Bello F, Correia O, Branquinho C. 2017. Which plant traits respond to aridity? A critical step to assess functional diversity in Mediterranean drylands. *Agricultural and Forest Meteorology* **239**:176–184.
- Ollano JM, Almería I, Eugenio I, von Arx MG. 2013. Under pressure: how a Mediterranean high-mountain forb coordinates growth and hydraulic xylem anatomy in response to temperature and water constraints. *Functional Ecology* **27**:1295–1303.
- Pauli H, Gottfried M, Dullinger S, Abdaladze O, Akhalkatsi M, Benito Alonso JL, Coldea G, Dick J, Erschbamer B, Fernández Calzado R, Ghosn D, Holten JJ, Kanka R, Kazakis G, Kollár J, Larsson P, Moiseev P, Moiseev D, Molau U, Moleró Mesa J, Nagy L, Pelino G, Puşcaş M, Rossi G, Stanisci A, Syverhuset AO, Theurillat JP, Tomaselli M, Unterluggauer P, Villar L, Vittoz P, Grabherr G. 2012. Recent plant diversity changes on Europe's mountain summits. *Science* **336**:353–355.
- Pavoine S, Vallet J, Dufou AB, Gachet S, Daniel H. 2009. On the challenge of treating various types of variables: application for improving the measurement of functional diversity. *Oikos* **118**:391–402.
- Pellissier L, Fournier B, Guisan A, Vittoz P. 2010. Plant traits co-vary with altitude in grasslands and forests in the European Alps. *Plant Ecology* **211**:351–365.
- Pérez-Harguindeguy N, Diaz S, Garnier E, Lavorel S, Poorter H, Jaureguiberry P, Bret-Harte MS, Cornwell WK, Craine JM, Gurvich DE, Urcelay C, Veneklaas EJ, Reich PB, Poorter L, Wright IJ, Ray P, Enrico L, Pausas JG, de Vos AC, Buchmann N, Funes G, Quétier F, Hodgson JG, Thompson K, Morgan HD, ter Steege H, van der Heijden MGA, Sack L, Blonder B, Poschold P, Vaieretti MV, Conti G, Staver AC, Aquino S, Cornelissen HC. 2013. New handbook for standardised measurement of plant functional traits worldwide. *Australian Journal of Botany* **61**:167–234.
- Peruzzi L, Conti F, Bartolucci F. 2014. An inventory of vascular plants endemic to Italy. *Phytotaxa* **168**:1–75.
- Pescador DS, de Bello F, Valladares F, Escudero A. 2015. Plant trait variation along an altitudinal gradient in Mediterranean high mountain grasslands: controlling the species turnover effect. *PLoS One* **10**:e0118876.
- Pescador DS, Sierra-Almeida Á, Torres PJ, Escudero A. 2016. Summer freezing resistance: a critical filter for plant community assemblies in Mediterranean high mountains. *Frontiers in Plant Science* **7**:194.
- Petriccione B, Bricca A. 2019. Thirty years of ecological research at the Gran Sasso d'Italia LTER site: climate change in action. *Nature Conservation* **34**:9–39.
- Pignatti S. 2019. *Flora d'Italia*. Milano: Edagricole New Business Multimedia.
- Puglielli G, Crescente MF, Frattaroli AR, Gratani L. 2015. Leaf mass per area (LMA) as a possible predictor of adaptive strategies in two species of *Sesleria* (Poaceae): analysis of morphological, anatomical and physiological leaf traits. *Annales Botanici Fennici* **52**:135–144.
- Raich JW, Schlesinger WH. 1992. The global carbon dioxide flux in soil respiration and its relationship to vegetation and climate. *Tellus* **44**:81–99.
- Rao CR. 1982. Diversity and dissimilarity coefficients: a unified approach. *Theoretical Population Biology* **21**:24–43.
- Raunkiaer C. 1934. *The life forms of plants and statistical plant geography*. London: Oxford University Press.
- Read QD, Moorhead LC, Swenson NG, Bailey JK, Sanders NJ. 2014. Convergent effects of elevation on functional leaf traits within and among species. *Functional Ecology* **28**:37–45.
- Ricotta C, Moretti M. 2011. CWM and Rao's quadratic diversity: a unified framework for functional ecology. *Oecologia* **167**:181–188.
- Rogora M, Frate L, Carranza ML, Freppaz M, Stanisci A, Bertani I, Bottarin R, Brambilla A, Canullo R, Carbognani M, Cerrato C, Chelli S, Cremonese E, Cutini M, Di Musciano M, Erschbamer B, Godone D, Iocchi M, Isabellon M, Magnani A, Mazzola L, Morra di Cella U, Pauli H, Petey M, Petriccione B, Porro F, Psenner R, Rossetti G, Scotti A, Sommaruga R, Tappeiner U, Theurillat JP, Tomaselli M, Viglietti D, Viterbi R, Vittoz P, Winkler M, Matteucci G. 2018. Assessment of climate change effects on mountain ecosystems through a cross-site analysis in the Alps and Apennines. *The Science of the Total Environment* **624**:1429–1442.
- Rosbakh S, Leingärtner A, Hoiss B, Krauss J, Steffan-Dewenter I, Poschold P. 2017. Contrasting effects of extreme drought and snowmelt patterns on mountain plants along an elevation gradient. *Frontiers in Plant Science* **8**:1478.
- Rosbakh S, Römermann C, Poschold P. 2015. Specific leaf area correlates with temperature: new evidence of trait variation at the population, species and community levels. *Alpine Botany* **125**:79–86.
- Schöb C, Armas C, Guler M, Prieto I, Pugnaire FI. 2013. Variability in functional traits mediates plant interactions along stress gradients. *Journal of Ecology* **101**:753–762.
- Shipley B, Vile D, Garnier E. 2005. Functional linkages between leaf traits and net photosynthetic rate: reconciling empirical and mechanistic models. *Functional Ecology* **19**:602–615.
- Spasojevic MJ, Suding KN. 2012. Inferring community assembly mechanisms from functional diversity patterns: the importance of multiple assembly processes. *Journal of Ecology* **100**:652–661.
- Stanisci A, Carranza ML, Pelino G, Chiarucci A. 2011. Assessing the diversity pattern of cryophilous plant species in high elevation habitats. *Plant Ecology* **212**:595–600.
- Stanisci A, Evangelista A, Frate L, Stinca A, Carranza ML. 2016a. VIOLA - database of high mountain vegetation of central Apennines. *Phytocoenologia* **46**:231–232.
- Stanisci A, Frate L, Morra Di Cella U, Pelino G, Petey M, Siniscalco C, Carranza ML. 2016b. Short-term signals of climate change in Italian summit vegetation: observations at two GLORIA sites. *Plant Biosystems* **150**:227–235.
- Stanisci A, Pelino G, Blasi C. 2005. Vascular plant diversity and climate change in the alpine belt of the central Apennines (Italy). *Biodiversity and Conservation* **14**:1301–1318.
- Suding KN, Lavorel S, Chapin FS III, Cornelissen JHC, Díaz S, Garnier E, Goldberg DE, Hooper DU, Jackson ST, Navas ML. 2008. Scaling environmental change through the community-level: a trait-based response-and-effect framework for plants. *Global Change Biology* **14**:1125–1140.
- Tardella FM, Bricca A, Piermarteri K, Postiglione N, Catorci A. 2017. Context-dependent variation of SLA and plant height of a dominant, invasive tall grass (*Brachypodium genuense*) in sub-Mediterranean grasslands. *Flora* **229**:116–123.
- Theurillat JP, Iocchi M, Cutini M, De Marco G. 2011. Vascular plant richness along an elevation gradient at Monte Velino (Central Apennines, Italy). *Biogeographia* **28**:149–166.
- Tilman D, Knops J, Wedin D, Reich P, Ritchie M, Sieman E. 1997. The influence of functional diversity and composition on ecosystem processes. *Science* **277**:1300–1302.

- Vankoughnett MR, Grogan P. 2014. Nitrogen isotope tracer acquisition in low and tall birch tundra plant communities: a 2-year test of the snow-shrub hypothesis. *Biogeochemistry* **118**:291–306.
- Venn S, Pickering C, Green K. 2014. Spatial and temporal functional changes in alpine summit vegetation are driven by increases in shrubs and graminoids. *AoB Plants* 6:plu008; doi:10.1093/aobpla/plu008.
- Violle C, Navas ML, Vile D, Kazakou E, Fortunel C, Hummel I, Garnier E. 2007. Let the concept of trait be functional! *Oikos* **116**:882–892.
- Vojtkó AE, Freitag M, Bricca A, Martello F, Compañ JM, Küttim M, Kun R, de Bello F, Klimešová J, Götzenberger L. 2017. Clonal vs leaf-height-seed (LHS) traits: which are filtered more strongly across habitats? *Folia Geobotanica* **52**:1–13.
- Westoby M. 1998. A leaf-height-seed (LHS) plant ecology strategy scheme. *Plant and Soil* **199**:213–227.
- Westoby M, Falster DS, Moles AT, Vesk PA, Wright IJ. 2002. Plant ecological strategies: some leading dimensions of variation between species. *Annual Review of Ecology and Systematics* **33**:125–159.
- Winkler M, Lamprecht A, Steinbauer K, Hulber K, Theurillat JP, Breiner F, Choler P, Ertl S, Gutierrez Giron A, Rossi G, Vittoz P, Akhalkatsi M, Bay C, Benito Alonso JL, Bergstrom T, Carranza ML, Corcket E, Dick J, Erschbamer B, Fernandez Calzado R, Fosaa AM, Gavilan RG, Ghosn D, Gigauri K, Huber D, Kanka R, Kazakis G, Klipp M, Kollar J, Kudernatsch T, Larsson P, Mallaun M, Michelsen O, Moiseev P, Moiseev D, Molau U, Molero Mesa J, Morra di Cella U, Nagy L, Petey M, Puşcaş M, Rixen C, Stanisci A, Suen M, Syverhuset AO, Tomaselli M, Unterluggauer P, Ursu T, Villar L, Gottfried M, Pauli H. 2016. The rich sides of mountain summits - a pan-European view on aspect preferences of alpine plants. *Journal of Biogeography* **43**:2261–2273.
- Wright IJ, Reich PB, Westoby M, Ackerly DD, Baruch Z, Bongers F, Cavender-Bares J, Chapin T, Cornelissen JH, Diemer M, Flexas J, Garnier E, Groom PK, Gulias J, Hikosaka K, Lamont BB, Lee T, Lee W, Lusk C, Midgley JJ, Navas ML, Niinemets U, Oleksyn J, Osada N, Poorter H, Poot P, Prior L, Pyankov VI, Roumet C, Thomas SC, Tjoelker MG, Veneklaas EJ, Villar R. 2004. The worldwide leaf economics spectrum. *Nature* **428**:821–827.
- Zelený D. 2018. Which results of the standard test for community-weighted mean approach are too optimistic? *Journal of Vegetation Science* **29**:953–966.
